# Supplementary material for: A developmental biliary lineage program cooperates with Wnt activation to promote cell proliferation in hepatoblastoma
Source: Springer Nature journal article supplement (doi:10.1038/s41467-024-53802-4), 2024-11-20
Supplement: MOESM1 [file 41467_2024_53802_MOESM1_ESM.pdf]

**SUPPLEMENTARY INFORMATION****A developmental biliary lineage program cooperates with Wnt activation to promote cell proliferation in hepatoblastoma**

Peng V. Wu<sup>1,2,3,4,5,6\*</sup>, Matt Fish<sup>1,2,3</sup>, Florette K. Hazard<sup>7,8</sup>, Chunfang Zhu<sup>7</sup>, Sujay Vennam<sup>7</sup>, Hannah Walton<sup>1,2,3,9</sup>, Dhananjay Wagh<sup>10</sup>, John Coller<sup>10</sup>, Joanna Przybyl<sup>7,11,12</sup>, Maurizio Morri<sup>13,14</sup>, Norma Neff<sup>14</sup>, Robert B. West<sup>7</sup>, and Roel Nusse<sup>1,2,3\*</sup>

<sup>1</sup> Howard Hughes Medical Institute, Stanford University School of Medicine, Stanford, CA 94305, USA

<sup>2</sup> Department of Developmental Biology, Stanford University School of Medicine, Stanford, CA 94305, USA

<sup>3</sup> Institute for Stem Cell Biology and Regenerative Medicine, Stanford University School of Medicine, Stanford, CA 94305, USA

<sup>4</sup> Department of Pediatrics, Stanford University School of Medicine, Stanford, CA 94305, USA

<sup>5</sup> Current affiliation: Division of Oncology, Cincinnati Children's Hospital Medical Center, Cincinnati, OH 45229, USA

<sup>6</sup> Current affiliation: Department of Pediatrics, University of Cincinnati College of Medicine, Cincinnati, OH 45229, USA

<sup>7</sup> Department of Pathology, Stanford University School of Medicine, Stanford, CA 94305, USA

<sup>8</sup> Current affiliation: Department of Pathology and Laboratory Medicine, University of California Davis School of Medicine, Sacramento, CA 95817 USA

<sup>9</sup> Current affiliation: Department of Population Health, NYC Health + Hospitals, New York, NY 10004 USA

<sup>10</sup> Stanford Genomics, Stanford University, Stanford, CA 94305, USA

<sup>11</sup> Current affiliation: Department of Surgery, McGill University, Montreal, H4A 3J1 QC, Canada

<sup>12</sup> Current affiliation: Cancer Research Program, The Research Institute of the McGill University Health Centre, Montreal, H4A 3J1 QC, Canada

<sup>13</sup> Chan Zuckerberg Biohub, Stanford, CA 94305, USA

<sup>14</sup> Current affiliation: Altos Labs, Redwood City, CA 94065, USA

\*Correspondence to: Peng.Wu@cchmc.org and rnusse@stanford.edu

**Supplementary Table S1 (related to Fig. 1).  
Characteristics of hepatoblastoma specimens used for Smart-3SEQ**

| Pt     | Sex | Histology             | Prior Chemo | FGF19      |         |
|--------|-----|-----------------------|-------------|------------|---------|
|        |     |                       |             | Smart-3SEQ | In situ |
| LCM-1  | F   | Fetal & Embryonal     | N           | -          | n.d     |
| LCM-2  | M   | Predominant Embryonal | N           | +          | n.d.    |
| LCM-3  | F   | Mixed                 | Y           | +          | +       |
| LCM-4  | M   | Mixed                 | Y           | -          | n.d     |
| LCM-5  | F   | Mixed                 | Y           | +          | -       |
| LCM-6  | M   | Fetal & Embryonal     | N           | +          | +       |
| LCM-7  | M   | Mixed                 | N           | +          | +       |
| LCM-8  | M   | Fetal & Embryonal     | N           | +          | +       |
| LCM-9  | F   | Mixed                 | Y           | -          | n.d     |
| LCM-10 | F   | Fetal & Embryonal     | N           | +          | +       |
| LCM-11 | F   | Fetal & Embryonal     | N           | +          | +       |
| LCM-12 | F   | Fetal & Embryonal     | N           | +          | n.d     |
| LCM-13 | M   | Fetal & Embryonal     | N           | -          | n.d     |
| LCM-14 | M   | Fetal & Embryonal     | N           | -          | n.d     |
| LCM-15 | F   | Mixed                 | Y           | -          | n.d     |
| LCM-16 | F   | Mixed                 | Y           | -          | n.d     |
| LCM-17 | M   | Mixed                 | Y           | -          | n.d     |

Characteristics of the patients and tumors reported are from the date of the specimen. n.d. = not determined.

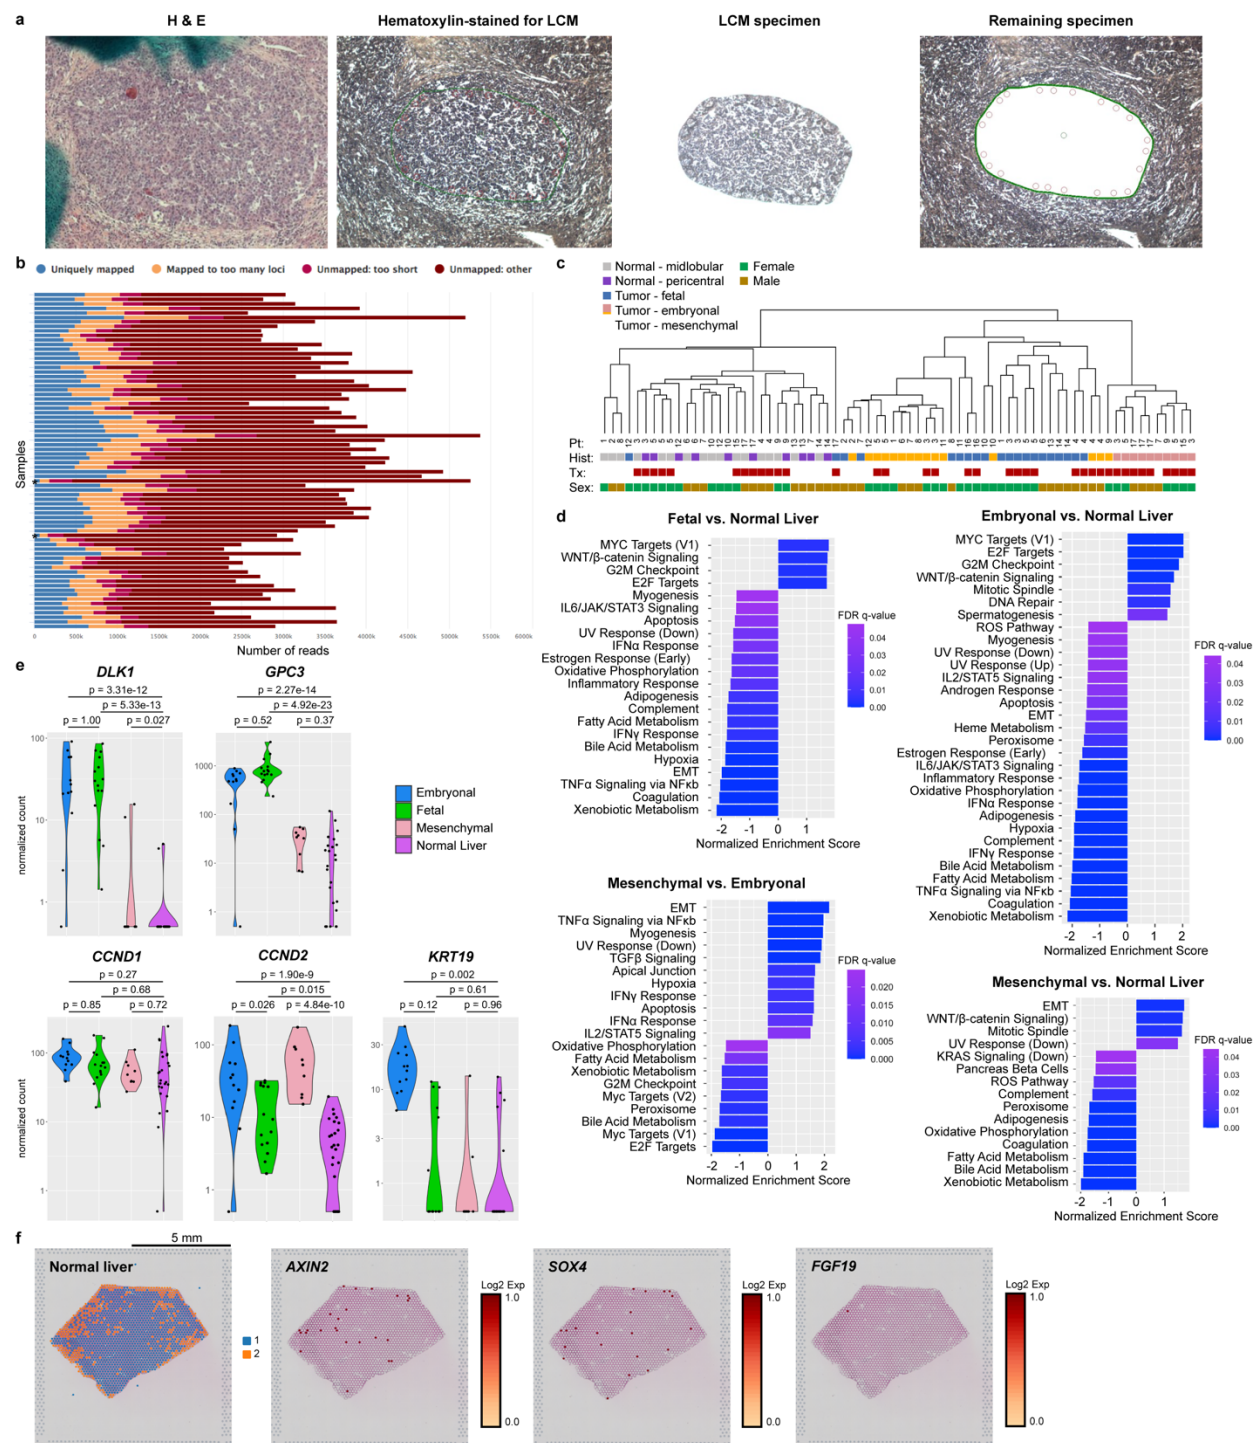

**Supplementary Fig. S1 (related to Fig. 1).** a) Example of specimen used for laser capture microdissection, from left: stained with hematoxylin and eosin (H&E), stained with hematoxylin for dissection, after laser capture microdissection, and remaining specimen following microdissection. b) Read alignment of samples assayed by Smart-3SEQ, using

STAR. \* indicates samples with poor quality that were excluded from further analysis. c) Unsupervised hierarchical clustering of results from Smart-3SEQ. d) Top hallmark pathways differentially expressed between Fetal vs. Normal Liver, Embryonal vs. Normal liver, Mesenchymal vs. Normal Liver and Mesenchymal vs. Embryonal components of hepatoblastoma ( $FDR < 0.05$ ), using gene set enrichment analysis (GSEA) on pre-ranked gene lists obtained from DESeq2. e) Normalized counts of *DLK1*, *GPC3*, cyclins *CCND1* and *CCND2*, and cholangiocytic marker *KRT19*. Adjusted p-values determined by two-tailed Wald test with Benjamini-Hochberg adjustment for multiple hypothesis testing. Blue: embryonal, green: fetal, pink: mesenchymal, purple: normal liver. f) Clusters identified by 10x Visium spatial transcriptomics on normal liver and spatial expression of *AXIN2*, *SOX4*, and *FGF19*. Source data are provided as a Source Data file.



**Supplementary Table S2 (related to Fig. 1).**  
**Signature Genes for Different Hepatoblastoma Histologies based on Smart-3SEQ**

| Fetal       | Embryonal     | Mesenchymal | Fetal-Specific | Embryonal-Specific | Mesenchymal-Specific |
|-------------|---------------|-------------|----------------|--------------------|----------------------|
| PEG10       | NKD1          | GNAS        | AZGP1          | AMBN               | SPARC                |
| GPC3        | GNAS          | SPARC       | G6PC           | MDFI               | MEF2C                |
| BCAM        | BCAM          | MMP14       | C1S            | MEX3A              | BGN                  |
| NKD1        | PEG10         | COL11A2     | CYP4F3         | VCAN               | COL3A1               |
| PEG3        | ROBO1         | ROBO1       | BAAT           | MMP16              | TIMP2                |
| FRRS1L      | RP11-5106.1   | FKBP10      | HP             | DACH1              | COL5A1               |
| DUSP9       | DKK1          | MAP1B       | ADH1B          | SOX4               | PDGFRA               |
| MEG3        | PEG3          | MSX1        | ABCA6          | TYRO3              | COL1A1               |
| ACSL4       | RPS7P1        | CKAP4       | PCK1           | FBLN2              | DCN                  |
| ROBO1       | MAP4K4        | APCDD1      | SLC51A         | LNPEP              | DNM3OS               |
| DLK1        | HMGA2         | UCHL1       | HSD17B6        | IBSP               | CD9                  |
| IGF2BP1     | APCDD1        | S100A4      | C1R            | NAP1L1             | COL1A2               |
| ARID3A      | MEX3A         | MEF2C       | ITIH3          | RCN2               | ANXA1                |
| MAGED1      | IGDCC3        | UNC5B       | CYP3A4         | TPBG               | MGP                  |
| TRIM71      | FKBP10        | ZFH3        | CYP8B1         | GNAS               | IGFBP7               |
| ITGA6       | ARID3A        | SERPINH1    | F9             | CXCL14             | IFI6                 |
| AFP         | TRIM71        | MDFI        | SERPING1       | NPTX1              | PLXDC2               |
| IGDCC3      | NAP1L1        | SP6         | CPT1A          | LAPTM4B            | ELN                  |
| SQLE        | IGF2BP1       | COLEC12     | HRG            | CRABP2             | ITM2B                |
| GNG4        | UGGT1         | COL15A1     | CYP27A1        | FKBP10             | CALM1                |
| TMEM246     | MDK           | COL1A2      | C6             | TEAD2              | PLS3                 |
| EPCAM       | FRRS1L        | PLS3        | CYP2C9         | PTCH1              | NFIC                 |
| PTP4A3      | HELLS         | S100A1      | HPR            | POSTN              | CYBRD1               |
| PLPPR1      | GPC3          | PLXNA1      | AOX1           | MARCKSL1           | TIMP3                |
| SNHG23      | RP11-864N7.2  | COL9A3      | C8G            | SOHLH2             | ANO1                 |
| RP11-5106.1 | AXIN2         | MAGED2      | ADH1C          | MSX1               | FXYD6                |
| GNAS        | TCF3          | MMP11       | CYP4A22        | FREM2              | AHNAK                |
| COL2A1      | MSX1          | PLD3        | LEAP2          | HNRNPA2B1          | CD81                 |
| SNAP25-AS1  | PLPPR1        | OXCT1       | SULT2A1        | ILF3               | ENG                  |
| DKK1        | RPS3          | COL1A1      | UGT2B10        | TUBBP1             | COL6A1               |
| PLVAP       | LAPTM4B       | NOTCH3      | CYP2E1         | RP11-278C7.1       | EGR1                 |
| CACNB4      | DPEP1         | ANXA5       | CES2           | CKAP4              | ZCCHC24              |
| APCDD1      | EPCAM         | ANGPTL2     | ORM2           | CPXM1              | JUNB                 |
| MAP4K4      | TRIM24        | PPT1        | HMGCS2         | MYCN               | VIM                  |
| KCNU1       | DUSP9         | ATP8B2      | APOA5          | PHF6               | COL12A1              |
| FAM3B       | MAGED1        | KIDINS220   | TAT            | XRCC5              | ANXA5                |
| UGGT1       | NT5DC2        | CPE         | APCS           | HNRNPU             | PPP1R12B             |
| TRIM24      | LEF1          | GSN         | APOC3          | SLC34A2            | IDS                  |
| SLC22A11    | RPL13P2       | UACA        | CCL16          | DBN1               | LPAR1                |
| NPNT        | RP11-771F20.1 | NES         | IGFBP1         | GPR161             | AEBP1                |
| ONECUT2     | RP5-1056L3.3  | COL5A2      | CYB5A          | BIRC5              | TAGLN                |
| MBNL3       | LRRRC75A-AS1  | ITM2B       | ANGPTL3        | TP53BP1            | EMILIN1              |
| EBF1        | DLK1          | EBF1        | APOC1          | WLS                | KALRN                |
| SP5         | HDAC2         | VIM         | FMO3           | FAM84A             | C1R                  |
| HMGA2       | MDFI          | TIMP2       | SLC22A7        | AXIN2              | MMP14                |
| IKBKAP      | PGC           | DKK1        | ACSM2A         | ELMO1              | ECM1                 |
| PABPC1      | LIN28B        | CUX1        | AKR1C2         | RASL11B            | LMNA                 |
| LEF1        | AFP           | S100A6      | PIPOX          | VANGL2             | FSTL1                |
| COL15A1     | MYCN          | MAGED1      | PCK2           | HDAC2              | COL8A1               |
| MDK         | COL2A1        | LEF1        | A2M            | HMGA2              | S100A6               |

Top 50 differentially expressed genes obtained by Smart-3SEQ and DESeq2 comparing fetal vs normal (Fetal), embryonal vs. normal (Embryonal), mesenchymal vs. normal (Mesenchymal), fetal vs. embryonal (Fetal-Specific), embryonal vs. fetal (Embryonal-Specific), mesenchymal vs. embryonal (Mesenchymal-Specific).

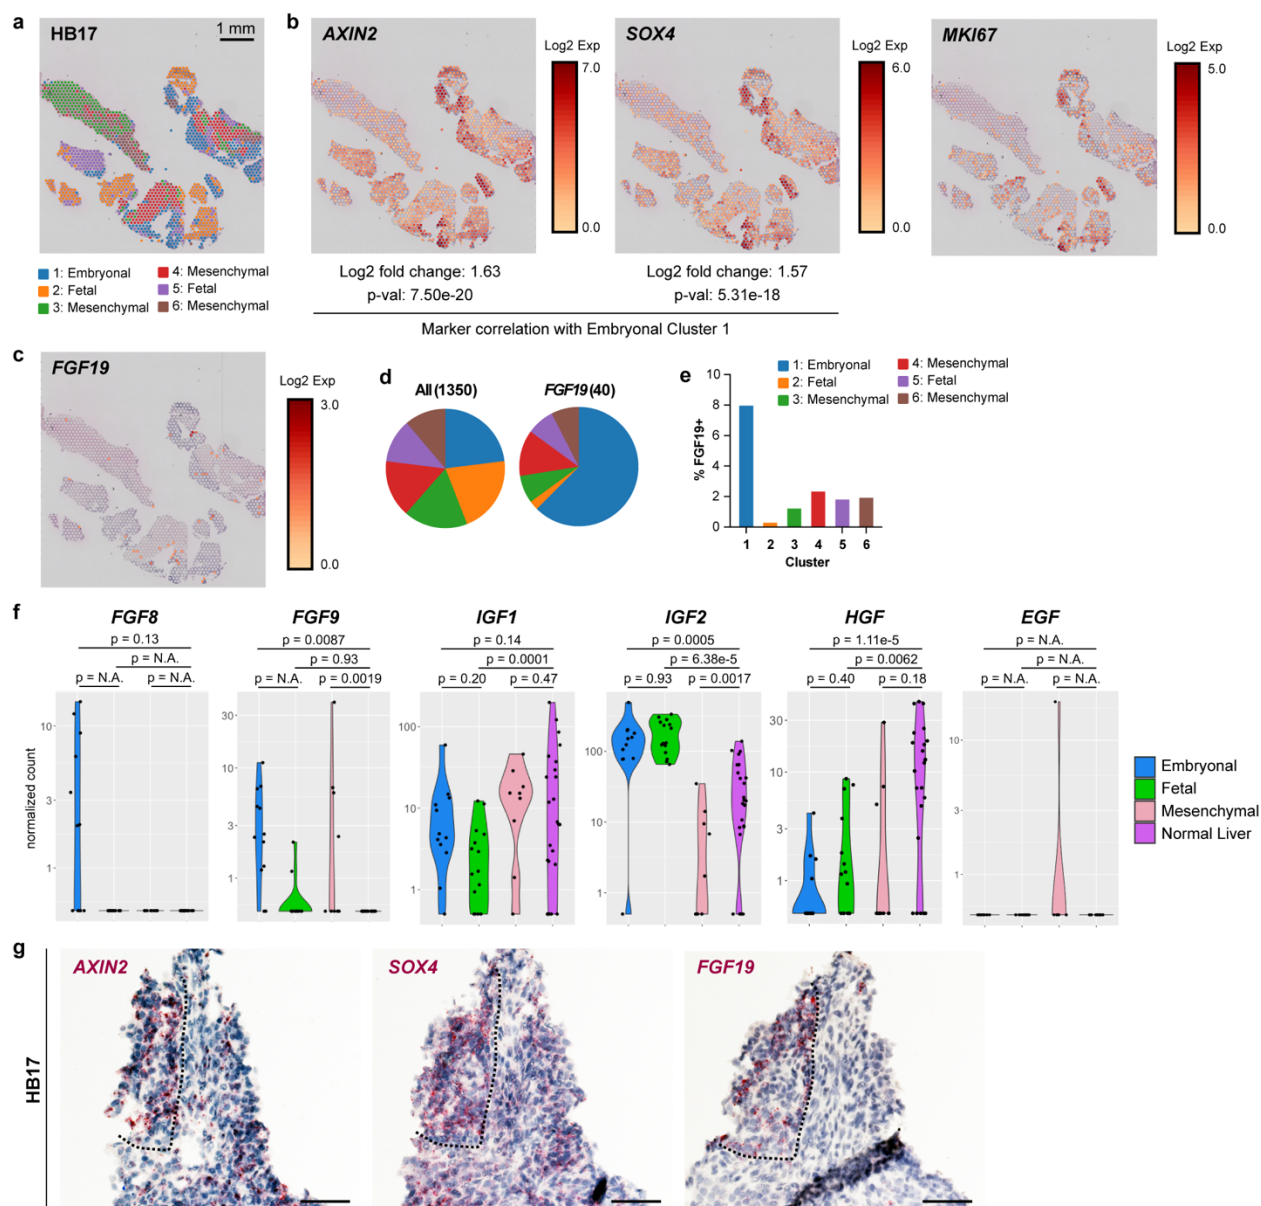

**Supplementary Fig. S2 (related to Fig. 2).** a) Clusters identified by 10x Visium spatial transcriptomics on primary hepatoblastoma HB17, assigned to fetal, embryonal, or mesenchymal histologies based on genes identified by Smart-3SEQ. b) Spatial expression of *AXIN2*, *SOX4*, and *MKI67* in HB17. Adjusted p-values determined in Cell Ranger by negative binomial test with Benjamini-Hochberg adjustment for multiple hypothesis testing. c) Spatial expression of *FGF19* in HB17. d) Pie charts showing distribution of all spots and all *FGF19*<sup>+</sup> spots according to cluster. e) Quantification of *FGF19*<sup>+</sup> spots/total spots in each cluster. f) Normalized counts of *FGF8*, *FGF9*, *IGF1*, *IGF2*, *MET*, and *EGF* detected by Smart-3SEQ. Adjusted p-values determined by two-

tailed Wald test with Benjamini-Hochberg adjustment for multiple hypothesis testing. Blue: embryonal, green: fetal, pink: mesenchymal, purple: normal liver. g) RNA in situ hybridization in serial sections of primary hepatoblastoma HB17 detecting *AXIN2*, *SOX4*, and *FGF19* in red. Black dashed lines outline cells expressing *FGF19*. Scale bar: 50  $\mu\text{m}$ . Source data are provided as a Source Data file.

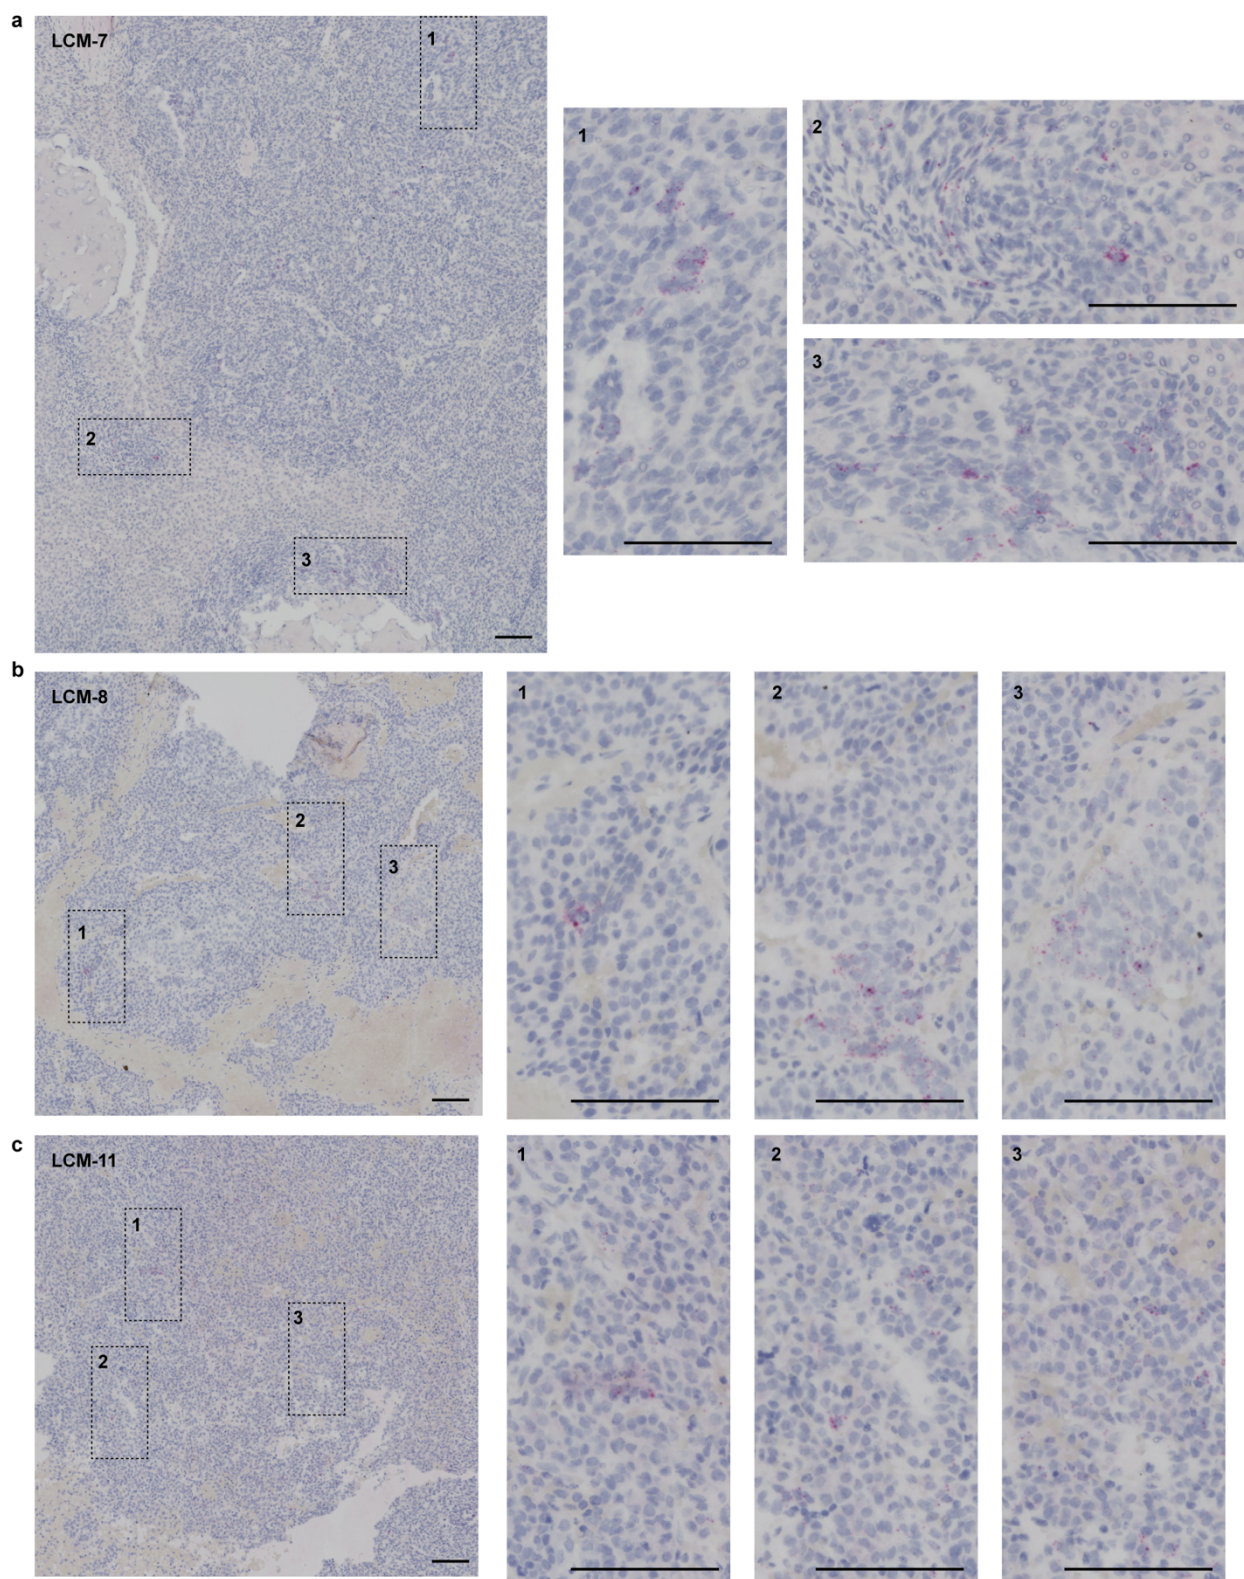

**Supplementary Fig. S3 (related to Fig. 2). FGF19 expression in primary hepatoblastomas. RNA in situ hybridization detecting FGF19 (red) in primary**

hepatoblastoma specimens used for Smart-3SEQ from the different patients as indicated: a) LCM-7, b) LCM-8, c) LCM-11. Black dotted rectangles show numbered regions that are magnified. Scale bar = 50  $\mu\text{m}$ .



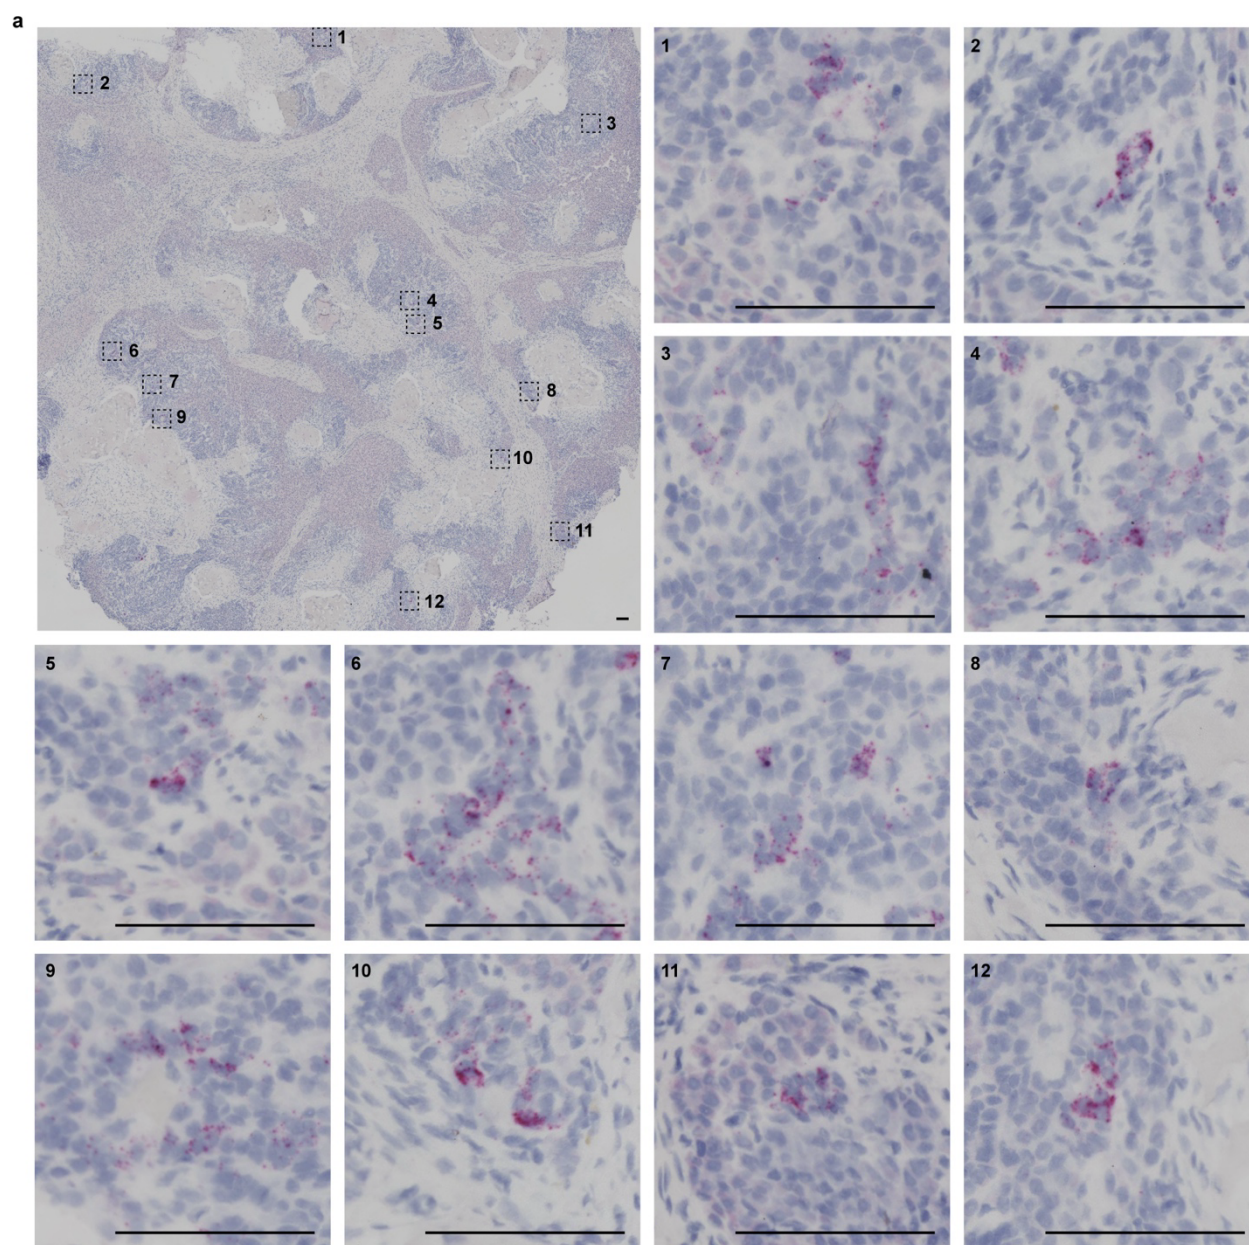

**Supplementary Fig. S4 (related to Fig. 2). FGF19 expression in primary hepatoblastomas.** a) RNA in situ hybridization detecting FGF19 (red) in the primary hepatoblastoma from which tumoroid HB4 was derived. Black dotted boxes show numbered regions that are magnified. Scale bar = 50  $\mu$ m. Note: this is the same specimen used for spatial transcriptomics in Fig. 2b.



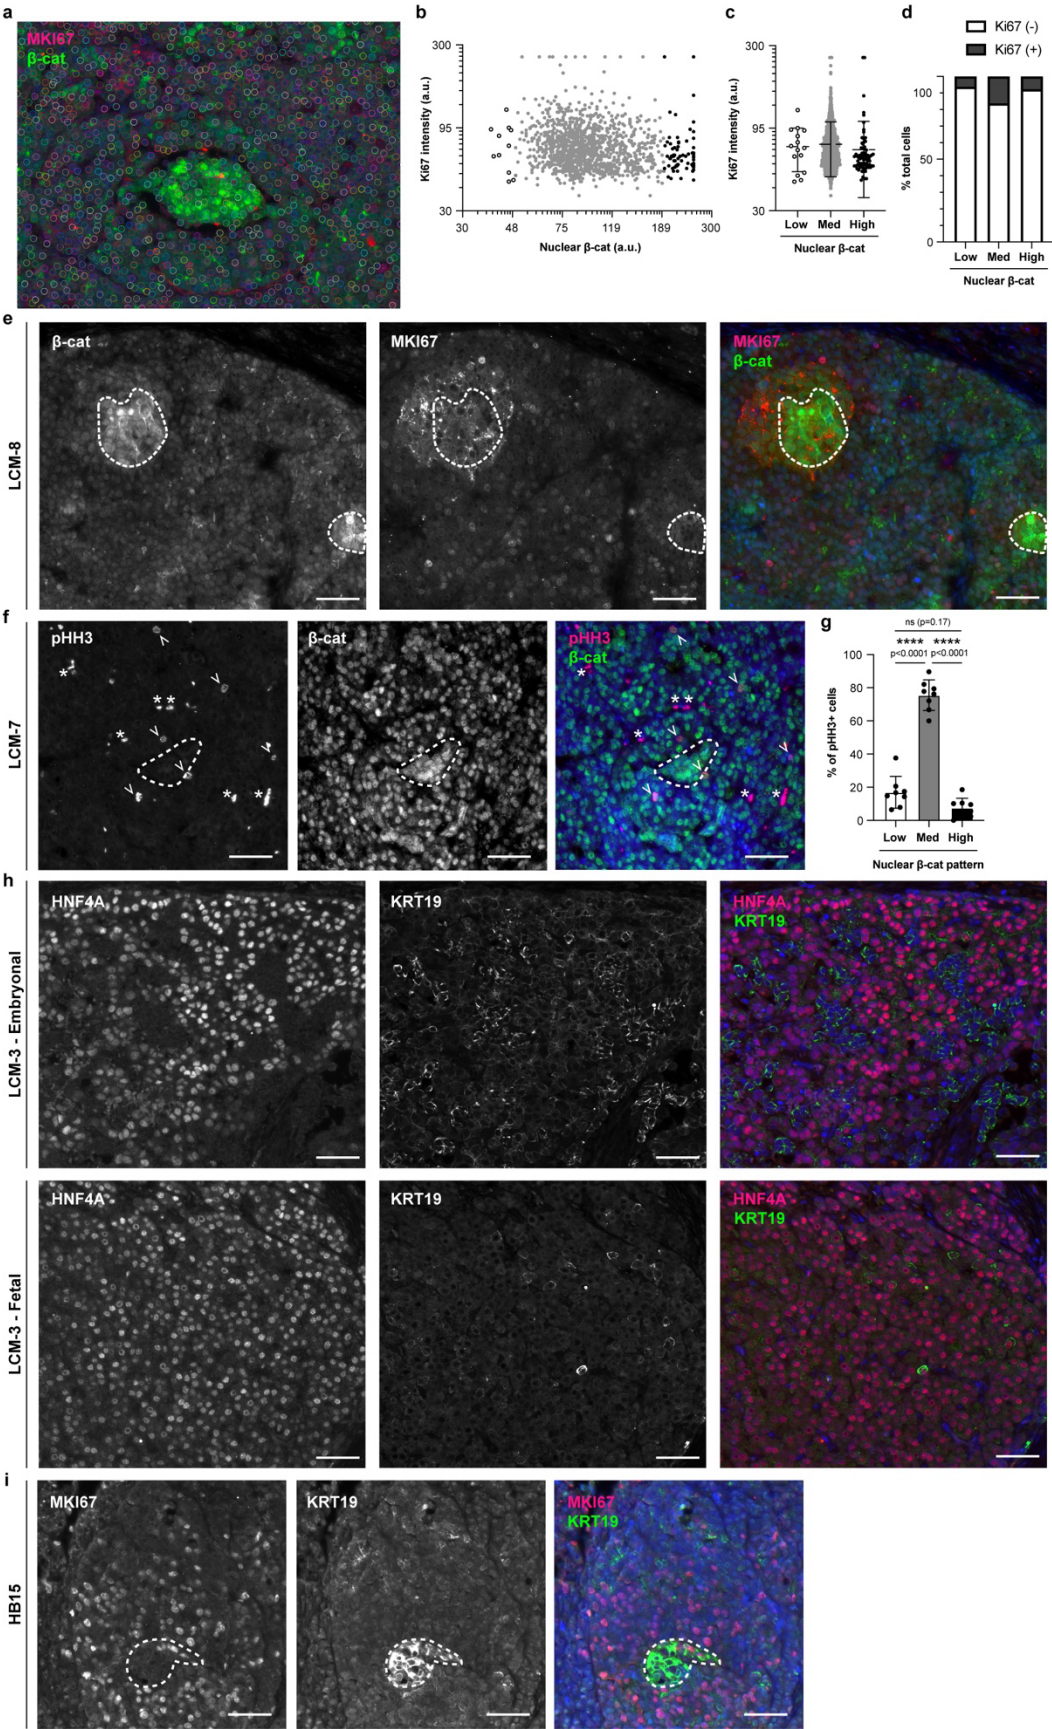

**Supplementary Fig. S5 (related to Fig. 3).** a) Representative image of co-immunofluorescence of MKI67 (magenta) and  $\beta$ -catenin (green) in HB15 with nuclear masks automatically drawn by TrackMate (ImageJ/Fiji plugin). b) Plot of Ki67 intensity within the nuclear masks in a) as a function of nuclear  $\beta$ -catenin intensity, colored by category: low (open circles), med (gray circles), and high (black circles). c) Distribution of Ki67 intensity comparing cells with low (open circles), med (gray circles), and high (black circles) nuclear  $\beta$ -catenin intensity from image in a). d) Percentage of Ki67<sup>+</sup> (intensity > 95 a.u.) vs. Ki67<sup>-</sup> cells (intensity < 95 a.u.) in cells with low (open circles), med (gray circles), and high (black circles) nuclear  $\beta$ -catenin intensity from image in a). e) Co-immunofluorescence of MKI67 (magenta) and  $\beta$ -catenin (green), merged with DAPI (blue), in primary hepatoblastoma section from patient LCM-8. f) Co-immunofluorescence of phospho-histone H3 (pHH3) (magenta) and  $\beta$ -catenin (green), merged with DAPI (blue). White arrowheads indicate pHH3<sup>+</sup> cells. White asterisks indicate non-specific staining of blood cells. i) Quantification of percentage of pHH3<sup>+</sup> cells with different patterns of  $\beta$ -catenin staining as indicated. Mean and s.d., n=8 patient specimens, >60 pHH3<sup>+</sup> cells scored for each experiment, ordinary one-way ANOVA, paired, with Tukey's correction for multiple comparisons. g) Co-immunofluorescence of HNF4A (magenta) and KRT19 (green), merged with DAPI (blue) in primary hepatoblastoma section from patient LCM-3, with representative images taken from regions of embryonal (top panels) and fetal (bottom panels) histology. h) Co-immunofluorescence of MKI67 (magenta) and KRT19 (green), merged with DAPI (blue). For all panels – scale bar: 50  $\mu$ m, \*\*\*\*: p < 0.0001, ns: not significant. Source data are provided as a Source Data file.



**Supplementary Table S3 (related to Fig. 4). Characteristics of hepatoblastoma tumoroids**

|             | Sex     | Histology                | Stage/Risk                            | Prior<br>Chemotherapy | Specimen<br>source | <i>CTNNB1</i><br>mutation | Other mutations (VAF) <sup>#</sup>                                                                                                                                         | Status               |
|-------------|---------|--------------------------|---------------------------------------|-----------------------|--------------------|---------------------------|----------------------------------------------------------------------------------------------------------------------------------------------------------------------------|----------------------|
| <b>HB1</b>  | M       | Fetal &<br>Embryonal     | Relapsed/metastatic                   | Y                     | Lung<br>metastasis | A21_G38del                | n.d.                                                                                                                                                                       | Deceased             |
| <b>HB4</b>  | M       | Mixed (with<br>teratoid) | Intermediate Risk<br>(later relapsed) | Y                     | Resection          | A5_S37del                 | <i>FGF4</i> P175S (48%)<br><i>SMAD4</i> I525V (50%)                                                                                                                        | CR2                  |
| <b>HB6</b>  | M       | Mixed (with<br>teratoid) | Relapsed                              | Y                     | Resection          | D32N                      | <i>AR</i> A646 (99%)<br><i>FGFR2</i> c1287+2A>G (38%)                                                                                                                      | Deceased             |
| <b>HB7*</b> | unknown | Fetal &<br>Embryonal     | Unknown                               | Y                     | Resection          | S23_S33delinsP            | n.d.                                                                                                                                                                       | unknown              |
| <b>HB12</b> | F       | Fetal &<br>Embryonal     | Low Risk                              | N                     | Biopsy             | G34V                      | <i>ARID1A</i> W1844ter<br>(germline)<br>otherwise n.d.                                                                                                                     | CR1                  |
| <b>HB13</b> | M       | Mixed (with<br>teratoid) | Intermediate Risk                     | Y                     | Resection          | G34R                      | <i>APC</i> I2341X (germline)<br><i>FGF4</i> A29V (48%)                                                                                                                     | CR1                  |
| <b>HB14</b> | F       | Mixed (with<br>teratoid) | Intermediate Risk                     | N                     | Biopsy             | A5_A80del                 | <i>GATA3</i> A396T (47%)                                                                                                                                                   | CR1                  |
| <b>HB15</b> | M       | Mixed (with<br>teratoid) | Low Risk<br>(later relapsed)          | Y                     | Resection          | A5_A80del                 | <i>TSC2</i> V1034I (52%)<br><i>APC</i> N2109H (49%)<br><i>ATM</i> H231R (47%)                                                                                              | CR2                  |
| <b>HB16</b> | F       | Fetal &<br>Embryonal     | High Risk<br>(metastatic)             | N                     | Biopsy             | A5_A80del                 | <i>LRP1B</i> E71* (58%)<br><i>BCR</i> V1107I (18%)<br><i>CDKN1B</i> L120M (43%)<br><i>SMARCA4</i> P913L (39%)<br><i>BCR</i> T1018A (14%)<br><i>NFE2L2</i> E79_E82del (25%) | Ongoing<br>treatment |
| <b>HB17</b> | F       | Mixed                    | Intermediate Risk                     | N                     | Biopsy             | A5_A80del                 | <i>ARID1A</i> N106fs (13%)<br><i>BTK</i> R492H (50%)<br><i>ERBB2</i> P625L (46%)<br><i>KDR</i> A772V (45%)<br><i>FOXR2</i> S92N (41%)<br><i>FGF4</i> A24T (35%)            | CR1                  |

Characteristics of the patients and tumors reported are from the date of the specimen. n.d. = not determined.

<sup>#</sup>Mutations identified from the Stanford Actionable Mutation Panel (STAMP) for Solid Tumors, an in-house NGS assay that covers 130 genes.

\*Gift from Bruce Wang (UCSF), corresponds to patient 7 from Song et al. 2022

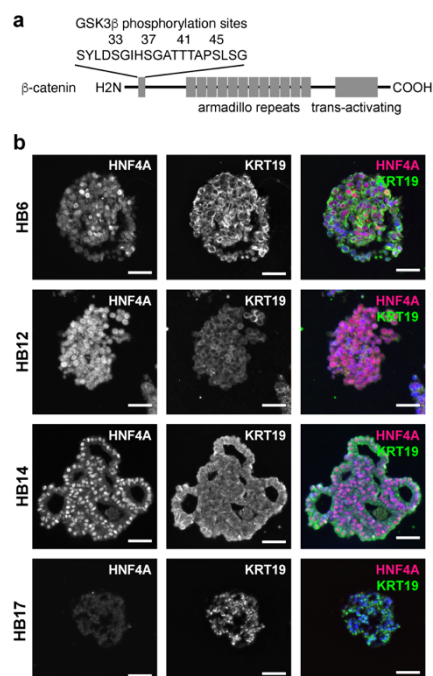

**Supplementary Fig. S6 (related to Fig. 4).** a) Domain structure of  $\beta$ -catenin showing the GSK3 $\beta$  phosphorylation sites within the region of exon 3 affected by mutations in the hepatoblastoma tumoroids. b) Immunofluorescence detecting HNF4A (magenta), KRT19 (green), and merged with DAPI (blue) in tumoroids from HB6, HB12, HB14, HB17 (late passage). Scale bar: 50  $\mu$ m.

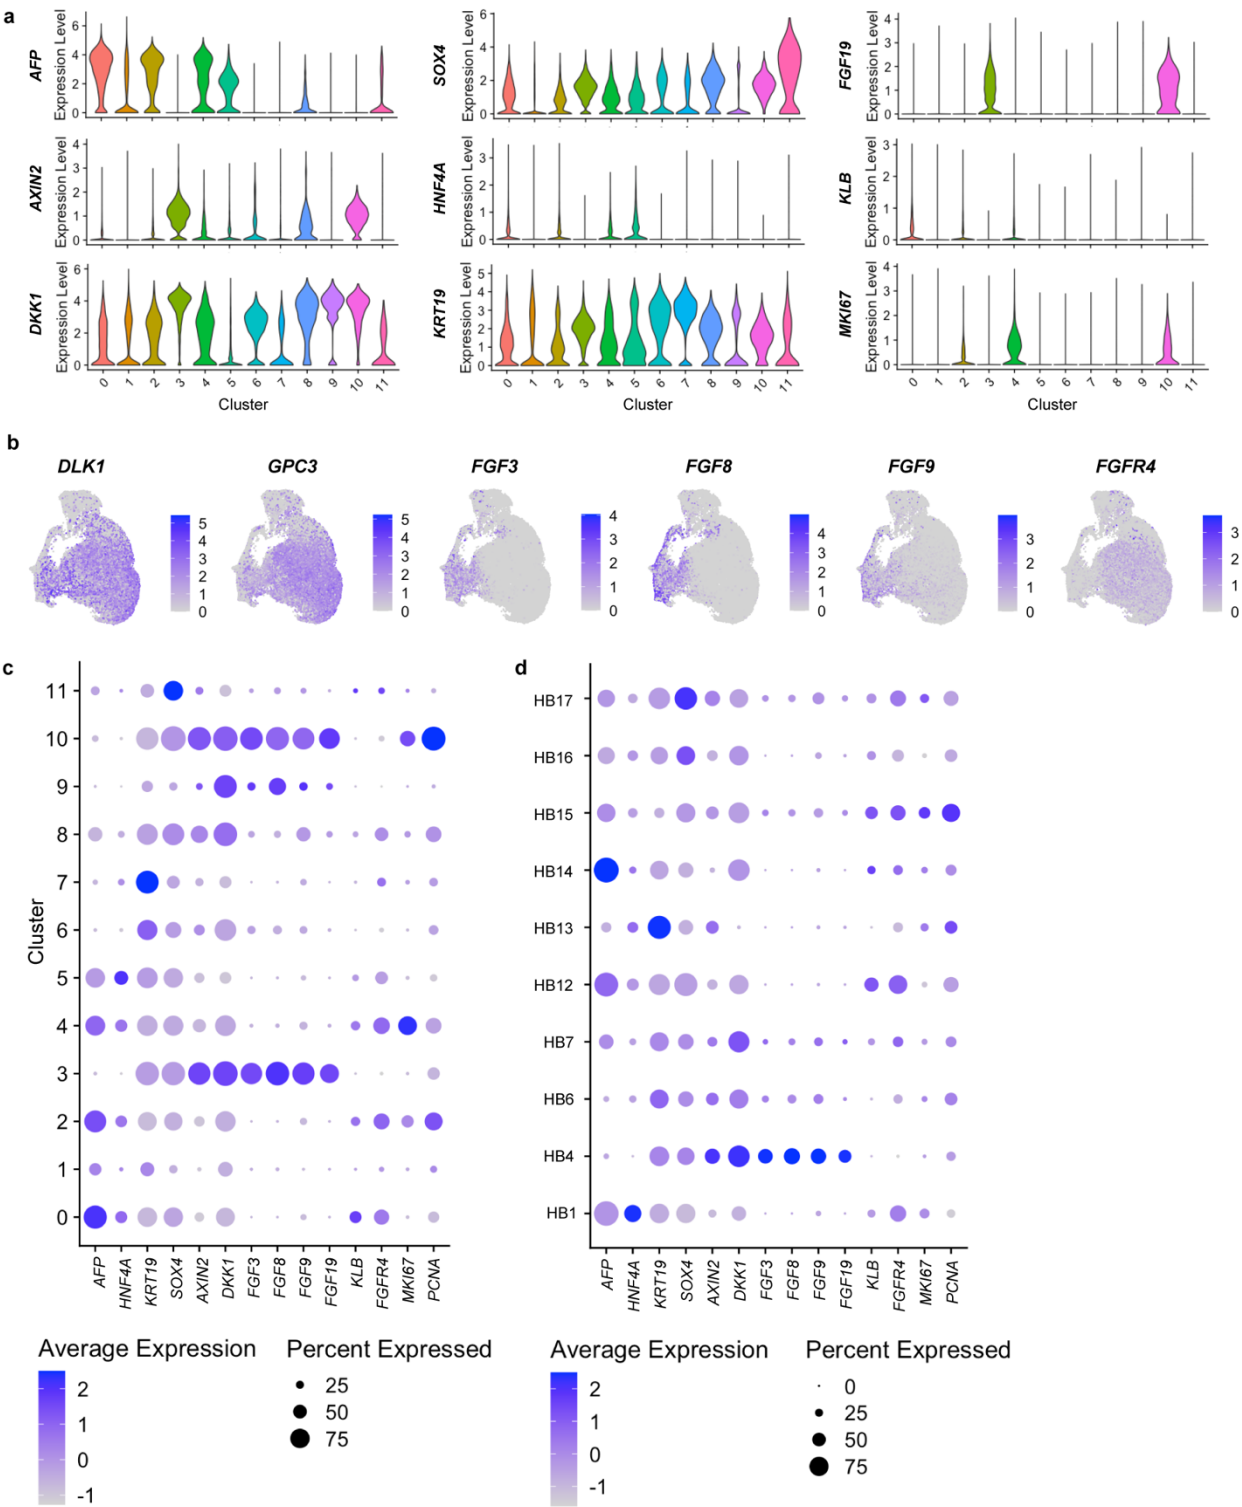

**Supplementary Fig. S7 (related to Fig. 5).** a) Violin plots showing relative gene expression of different hepatoblastoma genes across aggregated clusters from all tumoroids. b) UMAP plots showing relative gene expression for hepatoblastoma markers,

FGFs, FGFR4. Color scales indicate normalized expression obtained by the LogNormalize function in Seurat. c) Dot plot showing average gene expression and % of cells expressing various markers in different clusters. d) Dot plot showing average gene expression and % of cells expressing various markers in different HB tumoroids.

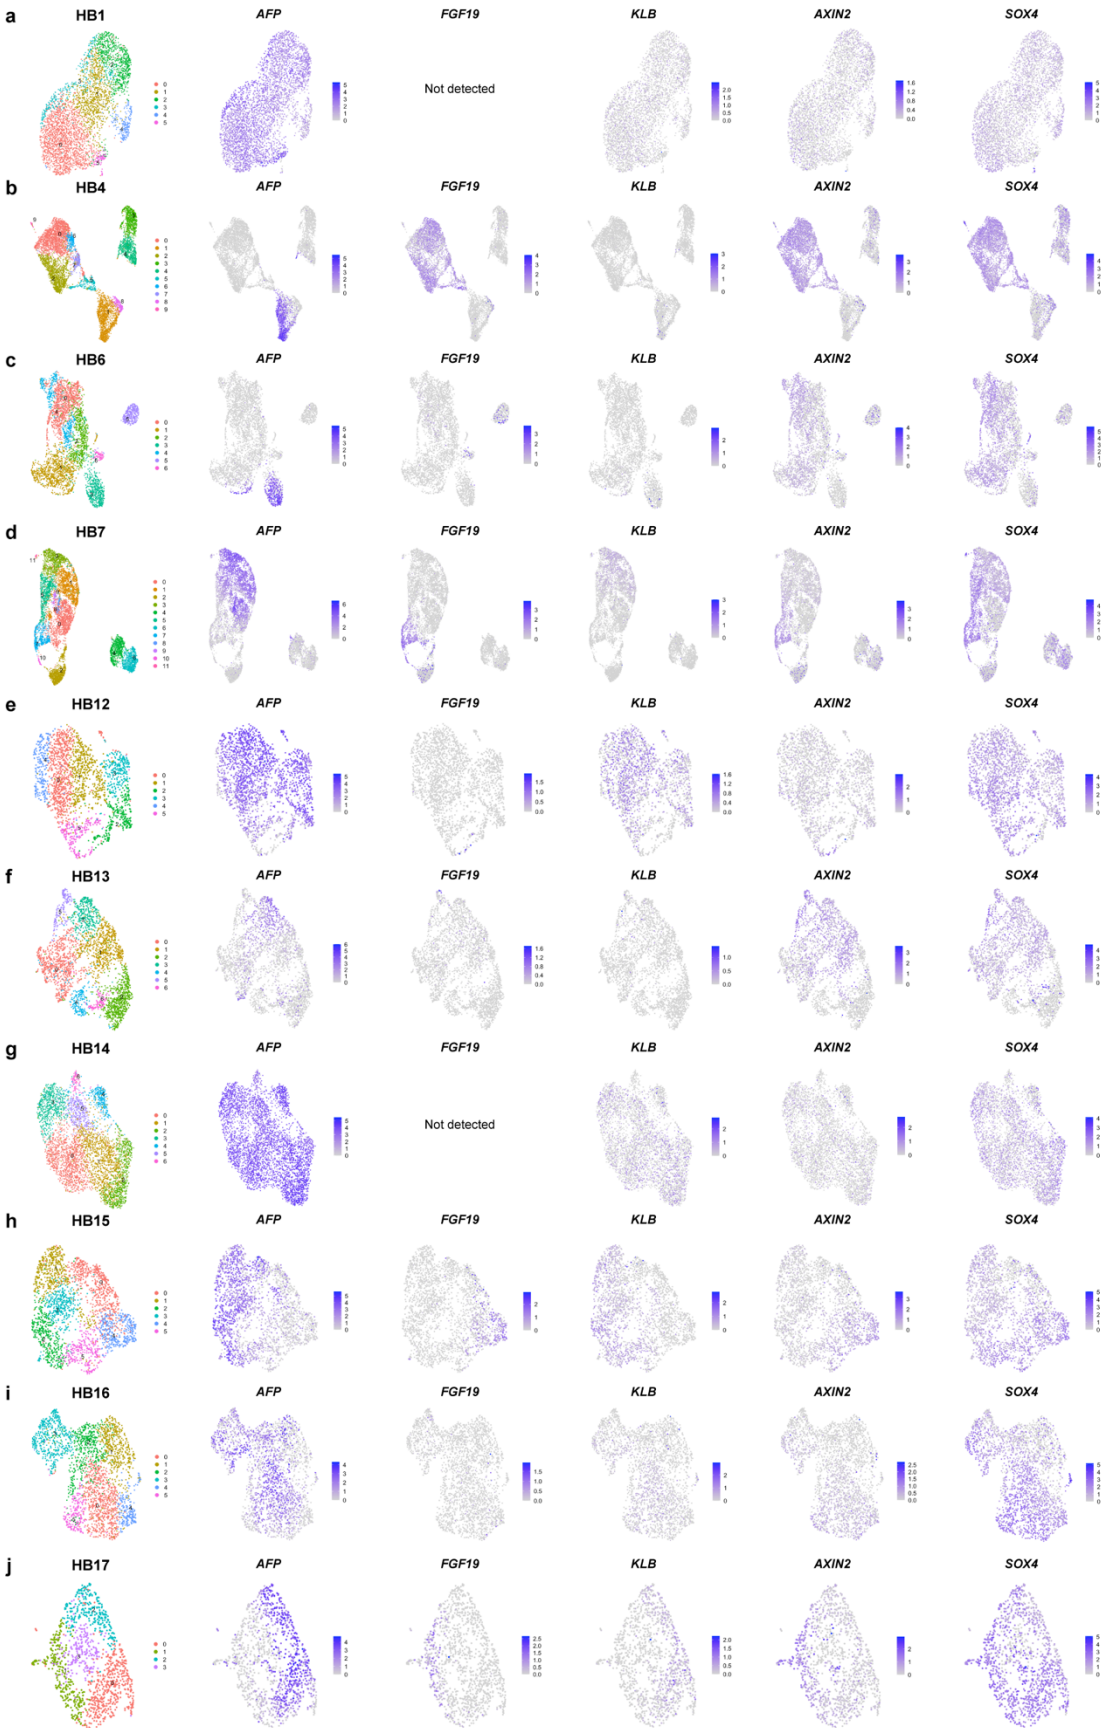

**Supplementary Fig. S8 (related to Fig. 5).** UMAP representation of scRNA sequencing results of hepatoblastoma tumoroids from 10 different patients analyzed separately, colored by cluster, and showing gene expression of *AFP*, *FGF19*, *KLB*, *AXIN2*, and *SOX4*. a) HB1, b) HB4, c) HB6, d) HB7, e) HB12, f) HB13, g) HB14, h) HB15, i) HB16, j) HB17. Color scales indicate normalized expression obtained by the LogNormalize function in Seurat.

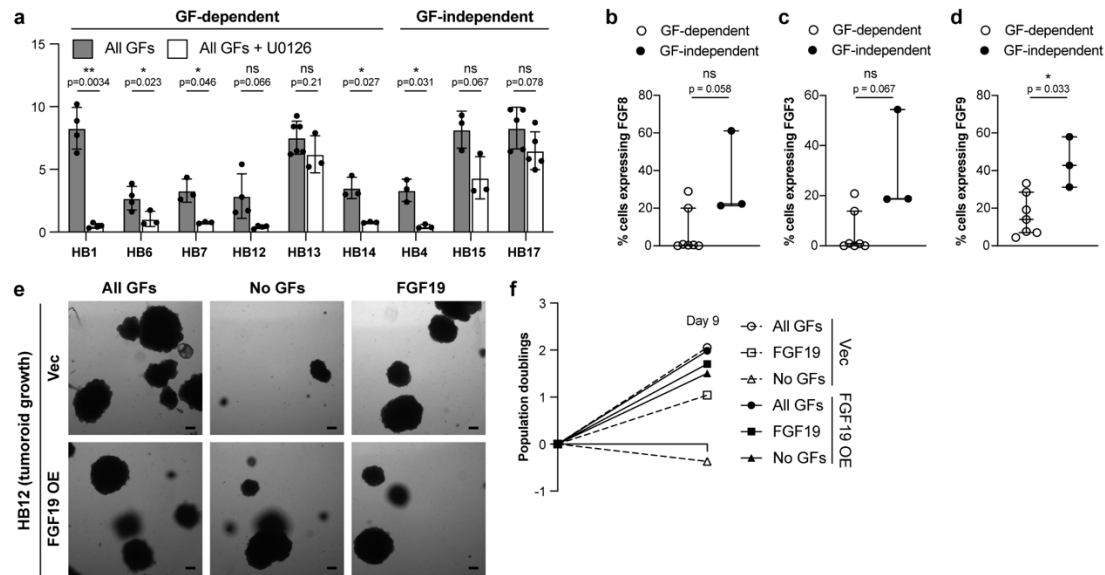

**Supplementary Fig. S9 (related to Fig. 6).** a) Quantification of colony formation assay of single cells from tumoroids growing for 2 weeks in media containing all GFs (EGF + FGF10 + HGF) or all GFs + MEK inhibitor U0126 (5  $\mu$ M). Mean and s.d. for HB1 (n=4), HB6 (n=4), HB7 (n=3), HB12 (n=4), HB13 (n=6), HB4 (n=3), HB15 (n=3), HB17 (n=5), paired two-tailed student t-test except for HB6 and HB13 (unpaired two-tailed student t-test). Percentage of cells expressing b) FGF8, c) FGF3, and d) FGF9 determined by scRNAseq. Median and interquartile range, comparing GF-dependent (open circles, n=6) and GF-independent (filled circles, n=3) tumoroids by Mann-Whitney test. e) HB12 tumoroids transduced with lentiviral GFP vector or FGF19, at the end of 9 days after initially plating as intact tumoroids to a density of 50,000 cells/well and grown in all GFs (left), no GFs (middle), or FGF19 (right). Scale bar: 100  $\mu$ m. f) Population doublings determined from n=1 experiment in e). For all panels – \*: p<0.05, \*\*: p<0.01, ns: not significant. Source data are provided as a Source Data file.

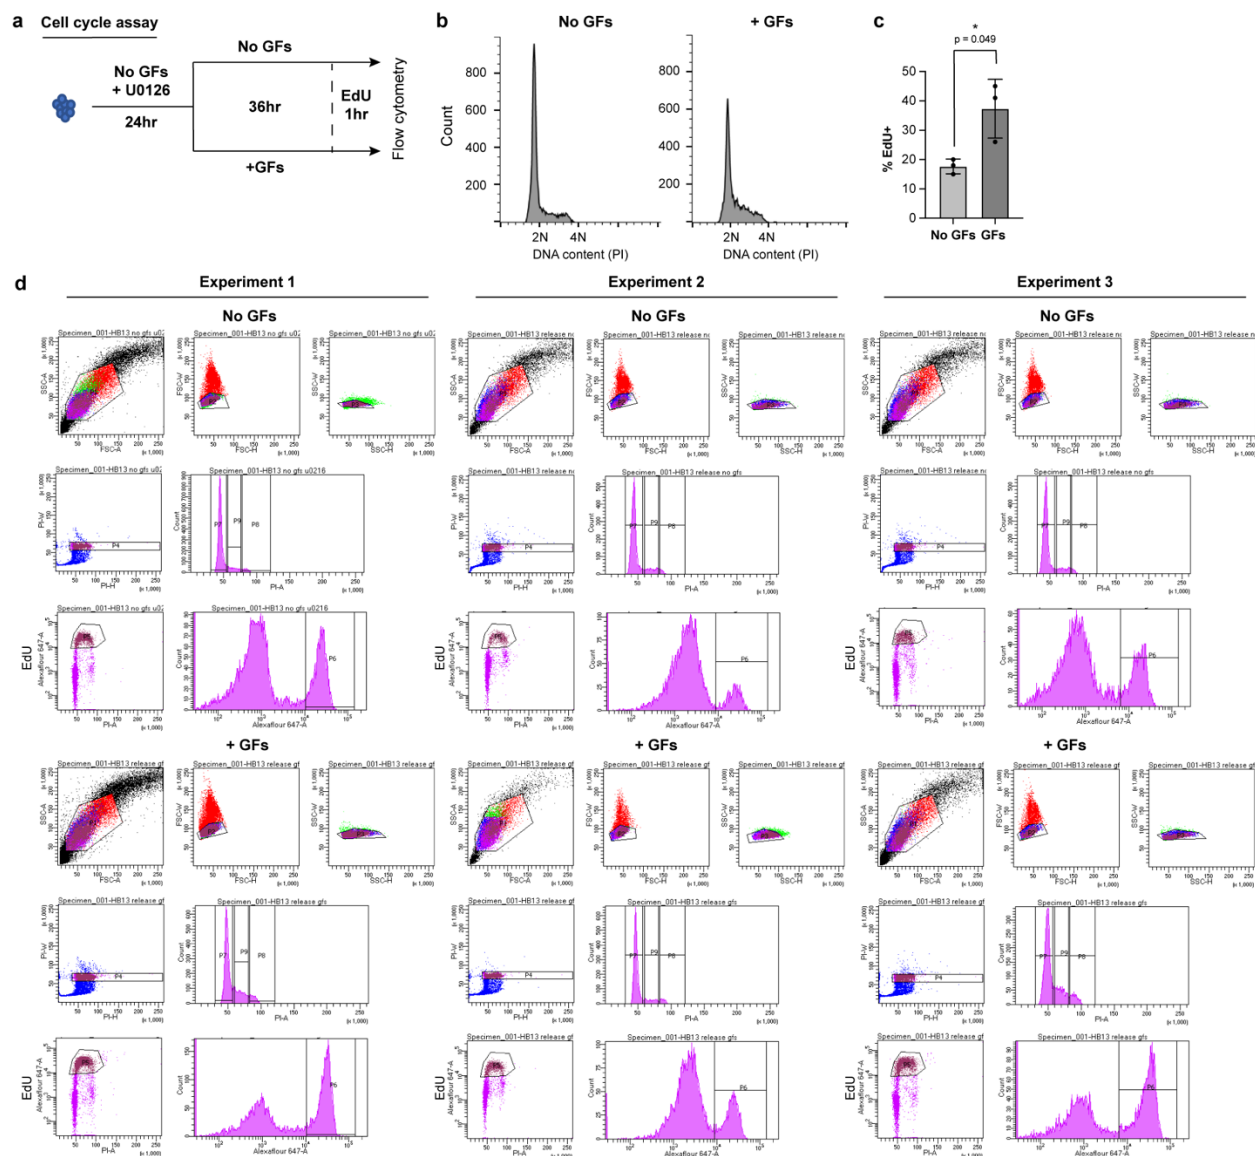

**Supplementary Fig. S10 (related to Fig. 6).** a) Schema for cell cycle assay in b) and c). b) Representative flow cytometry analysis of HB13 cells growing in media with no GFs and with U0126 (5  $\mu$ M) for 24hrs, then released into media with no GFs or with all GFs for 36 hrs, stained with PI for DNA content. c) Quantification of %EdU+ cells from flow cytometry experiment on HB13 cells as in a) (mean and s.d.,  $n = 3$  independent experiments, \* denotes  $p < 0.05$  by paired student t-test). d) Gating strategies for experiments in c). Source data are provided as a Source Data file.



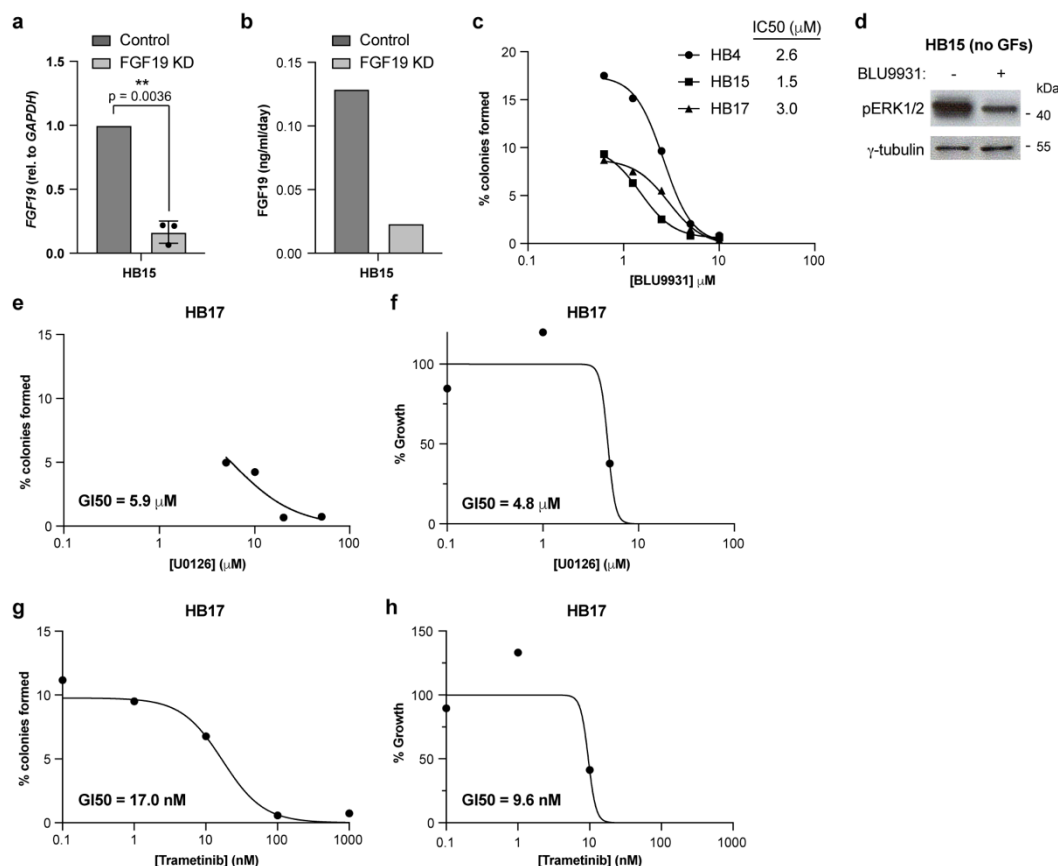

**Supplementary Fig. S11 (related to Fig. 7).** a) qRT-PCR for FGF19 in HB15 cells expressing lentiviral shRNA to luciferase (control) or *FGF19*. Mean and s.d., n = 3 independent experiments, paired two-tailed t-test, \*\* denotes p<0.01. b) FGF19 ELISA in HB15 cells expressing lentiviral shRNA to luciferase (control) or *FGF19*, grown in the absence of exogenous growth factors. c) Quantification of colony formation assay of single cells from the indicated tumoroids in media without GFs and with the FGFR4 inhibitor, BLU9931, at the concentrations indicated, with estimated IC50 as indicated. d) Immunoblot for phospho-ERK and control (γ-tubulin) in HB15 cells growing in media without exogenous growth factors, in the absence and presence of BLU9931 10 μM (2 hr). e) Quantification of colony formation assay of single cells from HB17 in media without GFs and with the MEK inhibitor, U0126, at the concentrations indicated, with estimated GI50. f) Quantification of % HB17 tumoroid growth after 3 days in media without GFs and with the MEK inhibitor, U0126, at the concentrations indicated, with estimated GI50. g) Quantification of colony formation assay of single cells from HB17 in media without GFs and with the MEK inhibitor, trametinib, at the concentrations indicated, with estimated

GI50. h) Quantification of % HB17 tumoroid growth after 3 days in media without GFs and with the MEK inhibitor, trametinib, at the concentrations indicated, with estimated GI50. Source data are provided as a Source Data file.

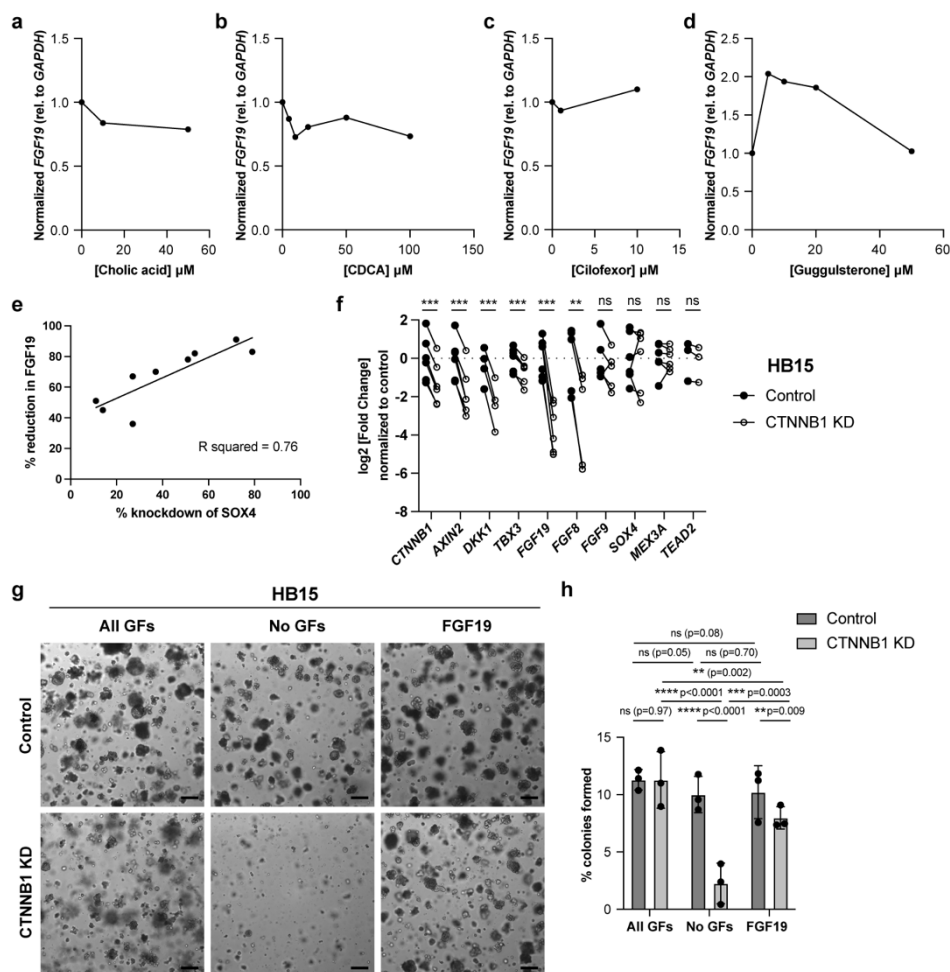

**Supplementary Fig. S12 (related to Fig. 8).** a) qRT-PCR for relative *FGF19* expression (normalized to *GAPDH*) in HB15 cells grown in media with all GFs after 24 hour incubation with cholic acid at the concentrations indicated. b) qRT-PCR for relative *FGF19* expression (normalized to *GAPDH*) in HB15 cells grown in media with all GFs after 24 hour incubation with chenodeoxycholic acid at the concentrations indicated. c) qRT-PCR for relative *FGF19* expression (normalized to *GAPDH*) in HB15 cells grown in media with all GFs after 48 hour incubation with FXR agonist, cilofexor, at the concentrations indicated. d) qRT-PCR for relative *FGF19* expression (normalized to *GAPDH*) in HB15 cells grown in media with all GFs after 48 hour incubation with FXR antagonist, guggulsterone, at the concentrations indicated. e) Graph showing % reduction in *FGF19* expression level as a function of % knockdown of *SOX4* as assessed by qRT-PCR across multiple experiments in which *SOX4* was knocked down by lentiviral shRNA in HB15 or HB17. f) qRT-PCR for Wnt target genes, FGFs, and *SOX4* target genes in HB15 cells

expressing lentiviral shRNA to luciferase (control) or *CTNNB1*. Exact p-values, paired two-tailed t-test – *CTNNB1* (n=6 independent experiments): 0.000002, *AXIN2* (n=6): 0.0002, *DKK1* (n=4): 0.0009, *TBX3* (n=6): 0.0005, *FGF19* (n=6): 0.0003, *FGF8* (n=5): 0.0010, *FGF9* (n=5): 0.16, *SOX4* (n=6): 0.97, *MEX3A* (n=6): 0.95, *TEAD2* (n=3): 0.13. g) Brightfield images of HB15 colonies expressing lentiviral shRNA to luciferase (control) or *CTNNB1*, seeded as single cells after 3 days of antibiotic selection, and grown for 2 weeks in media containing EGF + FGF10 + HGF (All GFs), no GFs, or FGF19. Scale bar: 200  $\mu$ m. h) Quantification of colony assay as in g). Mean and s.d., n=3 independent experiments, ANOVA with uncorrected Fisher's LSD. For all panels – \*: p<0.05, \*\*: p<0.01, \*\*\*: p<0.001, ns: not significant. Source data are provided as a Source Data file.
